# Supplementary material
Source: Elsevier journal article supplement (https://www.sciencedirect.com/science/article/pii/S1699258X21000589)
Supplement: mmc1 [file S1699258X21000589:mmc1.pdf]

## Anexo 1. Niveles de evidencia y grados de recomendación SIGN

| Niveles de evidencia    |                                                                                                                                                                                                                                                                       |
|-------------------------|-----------------------------------------------------------------------------------------------------------------------------------------------------------------------------------------------------------------------------------------------------------------------|
| 1++                     | Metaanálisis de alta calidad, revisiones sistemáticas de ensayos clínicos o ensayos clínicos de alta calidad con muy poco riesgo de sesgo.                                                                                                                            |
| 1+                      | Metaanálisis bien realizados, revisiones sistemáticas de ensayos clínicos o ensayos clínicos bien realizados con poco riesgo de sesgos.                                                                                                                               |
| 1-                      | Metaanálisis, revisiones sistemáticas de ensayos clínicos o ensayos clínicos con alto riesgo de sesgos.                                                                                                                                                               |
| 2++                     | Revisiones sistemáticas de alta calidad de estudios de cohortes o de casos y controles. Estudios de cohortes o de casos y controles con riesgo muy bajo de sesgo y con alta probabilidad de establecer una relación causal.                                           |
| 2+                      | Estudios de cohortes o de casos y controles bien realizados con bajo riesgo de sesgo y con una moderada probabilidad de establecer una relación causal.                                                                                                               |
| 2-                      | Estudios de cohortes o de casos y controles con alto riesgo de sesgo y riesgo significativo de que la relación no sea causal.                                                                                                                                         |
| 3                       | Estudios no analíticos, como informes de casos y series de casos.                                                                                                                                                                                                     |
| 4                       | Opinión de expertos.                                                                                                                                                                                                                                                  |
| Grados de recomendación |                                                                                                                                                                                                                                                                       |
| A                       | Al menos un metaanálisis, revisión sistemática o ensayo clínico clasificado como 1++ y directamente aplicable a la población diana de la guía; o un volumen de evidencia científica compuesto por estudios clasificados como 1+ y con gran concordancia entre ellos.  |
| B                       | Un volumen de evidencia científica compuesta por estudios clasificados como 2++, directamente aplicable a la población diana de la guía y que demuestran gran concordancia entre ellos; o evidencia científica extrapolada desde estudios clasificados como 1++ o 1+. |
| C                       | Un volumen de evidencia científica compuesta por estudios clasificados como 2+ directamente aplicable a la población diana de la guía y que demuestran gran consistencia entre ellos; o evidencia científica extrapolada desde estudios clasificados como 2++.        |
| D                       | Evidencia científica de nivel 3 o 4; o evidencia científica extrapolada desde estudios clasificados como 2+.                                                                                                                                                          |

Los estudios clasificados como 1- y 2- no deberían usarse para la elaboración de recomendaciones por su alta posibilidad de sesgo.

### Buena práctica clínica\*

✓ Práctica recomendada basada en la experiencia clínica y el consenso del equipo redactor.

\* En ocasiones el grupo elaborador se percata de algún aspecto práctico importante sobre el que se quiere hacer énfasis y para el cual no existe, probablemente, ninguna evidencia que lo soporte. En general, estos casos tienen que ver con algún aspecto del tratamiento considerado buena práctica clínica y que nadie cuestionaría habitualmente. Estos aspectos son valorados como puntos de buena práctica clínica. Estos mensajes no son una alternativa a las recomendaciones basadas en la evidencia, sino que deben considerarse únicamente cuando no existe otra manera de destacar dicho aspecto.

## Anexo 2. Niveles de evidencia y grados de recomendación enfoque GRADE-CERQual

### Componentes de la evaluación de la confianza en los estudios<sup>8</sup>

|                                                                                                                                                                                                                                                                                                                                         |
|-----------------------------------------------------------------------------------------------------------------------------------------------------------------------------------------------------------------------------------------------------------------------------------------------------------------------------------------|
| 1. <i>Limitaciones metodológicas de los estudios incluidos</i> : el grado de preocupación con respecto a la calidad del diseño o de la realización de los estudios primarios incluidos como evidencia para cada una de las conclusiones de la revisión.                                                                                 |
| 2. <i>Coherencia de los resultados de la revisión</i> : una evaluación de cómo de clara y convincente es la relación entre los datos de los estudios primarios y una conclusión de la revisión que sintetiza esos datos. Por "convinciente", queremos decir que esté bien apoyada.                                                      |
| 3. <i>Adecuación de los datos que contribuyen a una conclusión de la revisión</i> : la determinación global del grado de riqueza y cantidad de datos que respaldan una conclusión de la revisión.                                                                                                                                       |
| 4. <i>Relevancia de los estudios incluidos para la pregunta de revisión</i> : La medida en que el cuerpo de la evidencia proveniente de los estudios primarios que respaldan una conclusión de la revisión es aplicable al contexto (población o perspectiva, fenómeno de interés, entorno) especificado en la pregunta de la revisión. |

|                                                                                                                                                                                                                                                                                                                                                                                                                               |                                                                              |
|-------------------------------------------------------------------------------------------------------------------------------------------------------------------------------------------------------------------------------------------------------------------------------------------------------------------------------------------------------------------------------------------------------------------------------|------------------------------------------------------------------------------|
| <p><b>GRADE: Categorías de las recomendaciones*</b></p> <p><b>RECOMENDACIÓN FUERTE</b></p> <p>El panel tiene confianza en que los efectos deseables de la adherencia a una recomendación superan los efectos indeseables.</p> <p><b>RECOMENDACIÓN DÉBIL</b></p> <p>El panel concluye que los efectos deseables de la adherencia a una recomendación probablemente superan los riesgos, pero no están confiados o seguros.</p> | <p><b>Se recomienda</b></p> <p>↑↑ ↓↓</p> <p><b>Se sugiere</b></p> <p>↑ ↓</p> |
|-------------------------------------------------------------------------------------------------------------------------------------------------------------------------------------------------------------------------------------------------------------------------------------------------------------------------------------------------------------------------------------------------------------------------------|------------------------------------------------------------------------------|

*\*Teniendo en cuenta la fuerza y la dirección, las recomendaciones pueden ser fuertes a favor, fuertes en contra, débiles a favor o débiles en contra de una intervención.*
