# Supplementary material
Source: Elsevier journal article supplement (https://www.sciencedirect.com/science/article/pii/S1699258X21000589)
Supplement: mmc2 [file S1699258X21000589:mmc2.doc]

**ANEXO 4.**

**Tabla 2. Estudios incluidos en la RS de Thorpe J, 2018**

| **Estudios** | **Características y resultados principales** | | |
| --- | --- | --- | --- |
| **Combinación AINE con benzodiacepinas** | | | |
| Kravitz 1994 | ECA 4 ramas N=64 (5 semanas):  Ibuprofeno + alprazolam  Ibuprofeno + placebo  Alprazolam + placebo  Doble placebo | No diferencias en la puntuación EVA de dolor entre las distintas ramas | No se reportaron eventos adversos serios |
| Quijada-Carrera 1996 | ECA 4 ramas N=164 (8 semanas):  Tenoxicam + bromazepam  Tenoxicam + placebo  Bromazepam + placebo  Doble placebo | La combinación farmacológica no fue significativamente mejor que placebo | No se reportaron eventos adversos serios |
| Rusell 1991 | ECA 4 ramas N=78 (6 semanas):  Alprazolam e ibuprofeno  Ibuprofeno + placebo  Alprazolam + placebo  Doble placebo | La comparación del tratamiento combinado frente a placebo sugiere una disminución significativa del dolor y del índice de puntos sensibles | No se describe el número de pacientes con eventos adversos |
| **Combinación amitriptilina con fluoxetina** | | | |
| Goldenberg 1996 | ECA 4 ramas N=31 (6 semanas):  Amitriptilina + fluoxetina  Amitriptilina + placebo  Fluoxetina + placebo  Doble placebo | El tratamiento combinado fue más eficaz que la monoterapia o placebo en la mejoría del score FIQ, EVA, dolor y sueño | 9 de las 12 retiradas del estudio fueron por eventos adversos (3 en la rama de tratamiento combinado) |
| Zucker 2006 | ECA 2 ramas N=58 (6 semanas):  Amitriptilina + fluoxetina  Amitriptilina + placebo | El tratamiento combinado mejoró significativamente el score FIQ, EVA, y puntos sensibles frente al tratamiento con sólo amitriptilina | 8 retiradas por eventos adversos (7 en la rama de tratamiento combinado) |
| **Combinación amitriptilina con naproxeno** | | | |
| Goldenberg 1986 | ECA 4 ramas N=62 (6 semanas):  Amitriptilina + naproxeno  Naproxeno + placebo  Amitriptilina + placebo  Doble placebo | Los pacientes en tratamiento con amitriptilina sola o con naproxeno muestran mayor mejoría en EVA, dolor, sueño, fatiga, cansancio matutino y score de puntos sensibles | 8 pacientes tuvieron algún evento adverso, pero continuaron en el estudio |
| **Combinación amitriptilina con lidocaína** | | | |
| Vlainich 2010 | ECA 2 ramas N=30 (4 semanas):  Amitriptilina + lidocaína  Amitriptilina + placebo | No hubo diferencias estadísticamente significativas en la mejoría del dolor y números de puntos sensibles entre ambos grupos | No se describen eventos adversos |
| **Combinación melatonina con un antidepresivo** | | | |
| Hussain 2011 | ECA 4 ramas N=101 (8 semanas):  Fluoxetina + dosis altas melatonina  Fluoxetina + dosis bajas melatonina  Fluoxetina + placebo  Melatonina + placebo | La melatonina solo o en combinación fue efectiva en la mejoría del score FIQ | No se describen eventos adversos |
| de Zanette 2014 | ECA 3 ramas N=63 (6 semanas):  Amitriptilina + melatonina  Amitriptilina + placebo  Melatonina + placebo | Pacientes en tratamiento con melatonina sola o con amitriptilina presentaron una mejoría ligeramente mayor en el score para el dolor | La incidencia de eventos adversos menores fue significativamente menor en el tratamiento combinado |
| **Combinación carisoprodol, paracetamol y cafeína** | | | |
| Vaeroy 1989 | ECA 2 ramas N=58 (8 semanas):  Carisprodol + paracetamol + cafeína  Placebo | No se observaron diferencias estadísticamente significativas en EVA, calidad sueño y percepción de enfermedad entre ambos grupos después de 8 semanas | El único evento adverso fue somnolencia |
| **Combinación tramadol y paracetamol** | | | |
| Bennett 2003 | ECA 2 ramas N=315 (13 semanas):  Tramadol + paracetamol  Placebo | Los autores concluyen que la combinación de tramadol y paracetamol fue moderadamente efectiva en la reducción del dolor y síntomas relacionados | Se registraron más pacientes que reportaron al menos un evento adverso en el grupo de tratamiento combinado |
| **Combina ácido málico y magnésico** | | | |
| Russell 1995 | ECA 2 ramas N=24 (4 semanas):  Acido málico + magnésico  Placebo | La terapia combinada no mejora ninguna de las variables de resultado | No se observaron eventos adversos asociados con el tratamiento combinado |
| **Combina un IMAO con 5HTP** | | | |
| Nicolodi 1996 | ECA 4 ramas N=200 (12 meses):  IMAO + 5-HTP  IMAO  5-HTP  amitriptilina | Concluyen que el tratamiento combinado fue más efectivo en la reducción del dolor comparado con el resto de los tratamientos en monoterapia | Ninguno de los eventos adversos fue severo |
| **Combina pregabalina y duloxetina** | | | |
| Gilron 2016 | ECA 4 ramas N=41 (6 semanas):  Pregabalina + duloxetina  Pregabalina + placebo  Duloxetine + placebo  Double placebo | La terapia combinada mejoró significativamente las puntuaciones: SF-MPQ, FIQ, sueño y SF-36 comparado con monoterapia o placebo. | Ninguno de los eventos adversos fue severo |
