# Supplementary material
Source: Elsevier journal article supplement (https://www.sciencedirect.com/science/article/pii/S1699258X21000589)
Supplement: mmc3 [file S1699258X21000589:mmc3.doc]

## Anexo 3. Abreviaturas

ACR: Americam College of Rheumatology

AINE: Antinflamatorios no esteroideos

AP: Atención Primaria

CIE-9: Clasificación Internacional de Enfermedades. 9.ª revisión

CFSAT: Chronic fatigue syndrome attitudes test

CVRS: Calidad de vida relacionada con la salud

DASH: Disability Arm Shoulder and Hand

DCS: Decisional Conflict Scale

DDPRQ: Difficult Doctor Patient Relationship Questionnaire

DE: Desviación estándar

DLPFC: Cortex prefrontal Dorsolateral

DM: Diferencia de medias

DME: Diferencia de medias estandarizada

DN: Dolor neuropático

DR: Diferencia de riesgo

ECA: Ensayo clínico aleatorizado

EULAR: European League Against Rheumatism

EVA: Escala Visual Analógica

FAPI: Questionnaire on Doctor-Patient Interaction

FM: Fibromialgia

FIQ: Fibromyalgia Impact Questionnaire

GPC: Guía de Práctica Clínica

HeiQ: Health Education Impact Questionnaire

HPLP-II: Health Promoting Lifestyle Profile II

5HTP: 5-hidroxitriptófano

IC: Intervalo de confianza

IMAO: Inhibidor de la monoaminooxidasa

IRSN: Inhibidores de la recaptación de serotonina y norepinefrina

ITT: Intención de tratar

M1: Left motor cortex

MAC: Medicinas alternativas y complementarias

MYMOP: Measure Your Medical Outcomes Profile

NHP: Nottingham Health Profile

NPRS: Numeric Pain Rating Scale

NRS: Numeric Rating Scale

n.s.: No significiativo.

OR: Odds ratio

PASS-20: Pain Anxiety Symptoms Scale-20,

PCI: Pain coping inventory

PCS: Pain Catastrophizing Scale

farPGIC: Patient Global Impression of Change

PNE: Pain Neuroscience Education

PPT: Pressure pain threshold

rCS: Constant relativa

RR: Riesgo relativo

RS: Revisión sistemática

rTMS: Estimulación magnética repetitiva

SAMe: S-adenosil-L-metionina

SER: Sociedad Española de Reumatología

SDM: *Shared decission making*

SFC: Síndrome de fatiga crónica

SF-36: Short Form (36) Health Survey

SIGN: Scotish Intercollegiate Guidelines Network

SRAHP: Self Rated Abilities for Health Practices scale

SWD: Satisfaction With Decision

TDC: Toma de decisiones compartida

tDCS: Estimulación transcraneal de corriente directa

TENS: Transcutaneous Electrical Nerve Stimulation

x̄=: Media
